# Supplementary material for: Ni5P4-embedded FeV LDH porous nanosheets for enhancing oxygen evolution and urea oxidation reactions
Source: Royal Society of Chemistry journal article supplement (doi:10.1039/d3nj03260d), 2023-01-01
Supplement: d3nj03260d1.pdf [file d3nj03260d1.pdf]

## Supporting information

### $\text{Ni}_5\text{P}_4$ -embedded FeV LDH porous nanosheets for enhancing oxygen evolution and urea oxidation reaction

Jibiao Guan<sup>a</sup>, Xiao Li<sup>a</sup>, Yingjing Zhu<sup>a</sup>, Yinchun Dai<sup>a</sup>, Rui Zhang<sup>a</sup>, Baochun Guo<sup>b</sup>, Ming Zhang<sup>a\*</sup>

<sup>a</sup>National Engineering Lab for Textile Fiber Materials and Processing Technology, Zhejiang Sci-Tech University, Hangzhou 310018, PR China

<sup>b</sup>Department of Polymer Materials and Engineering, South China University of Technology, Guangzhou 510640, P.R. China

Email: zhangming@zstu.edu.cn

These authors contributed equally: Jibiao Guan, Xiao Li

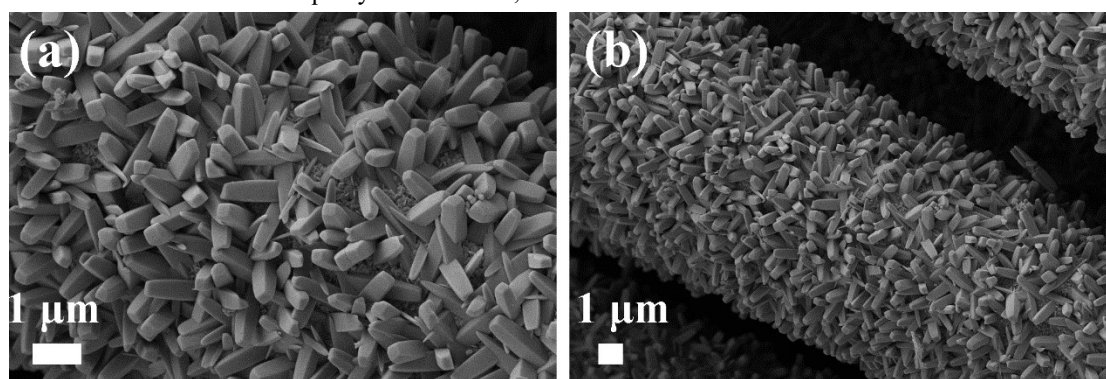

Fig. S1 (a-b) SEM images of FeV LDH.

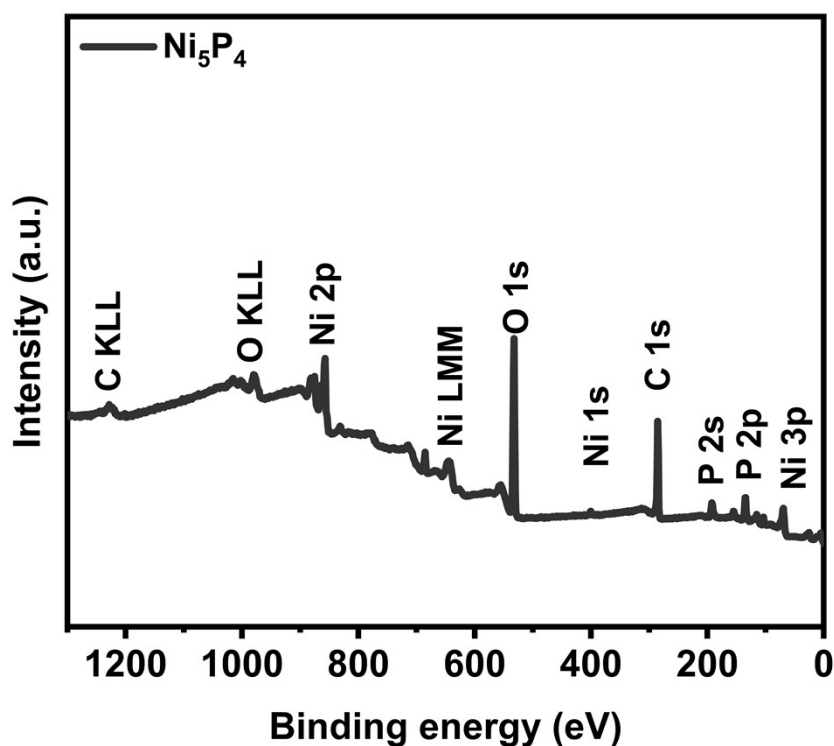

Fig. S2 XPS survey spectrum of  $\text{Ni}_5\text{P}_4$ .

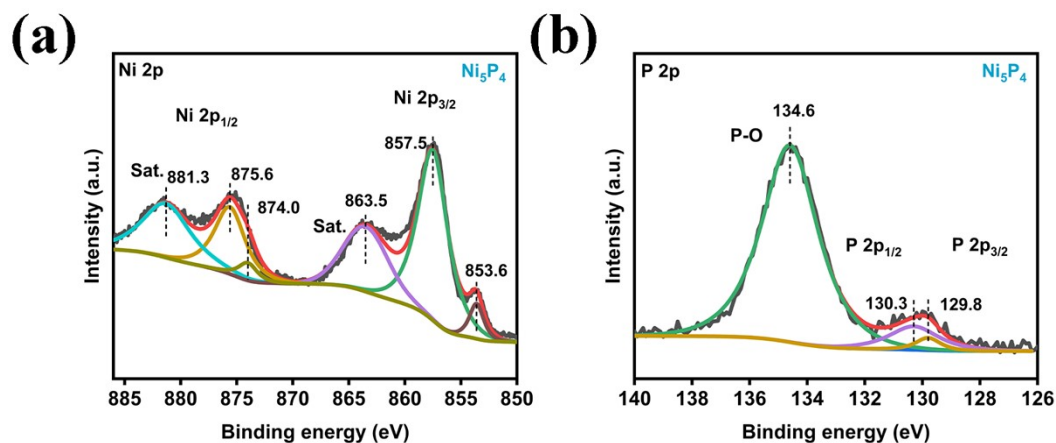

Fig. S3 (a-b) XPS spectra of Ni 2p and P 2p for  $\text{Ni}_5\text{P}_4$ .

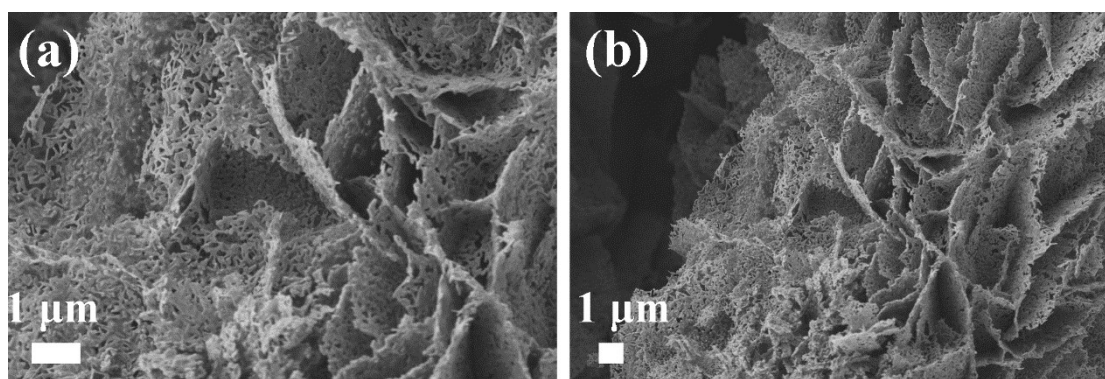

Fig. S4 (a-b) SEM images of  $\text{Ni}_5\text{P}_4$ .

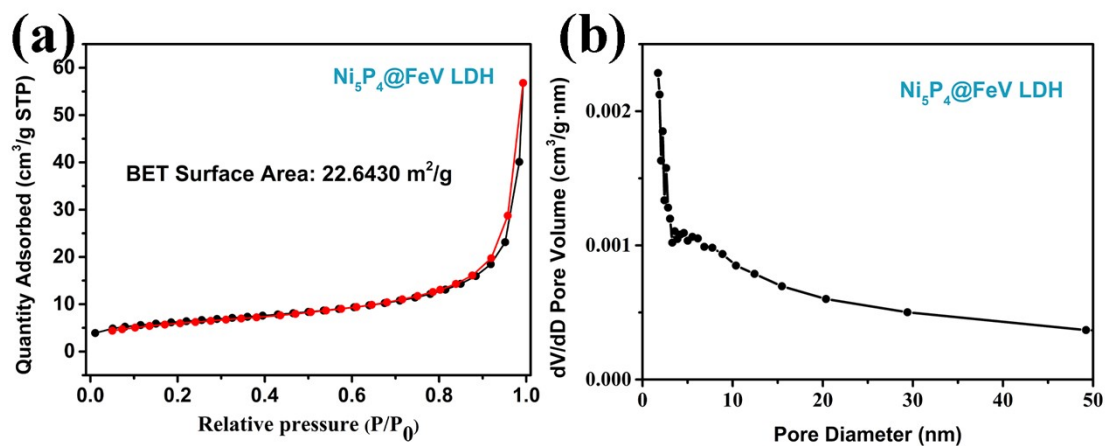

Fig. S5 (a) Nitrogen adsorption-desorption isotherm of  $\text{Ni}_5\text{P}_4@FeV$  LDH; (b) the pore size distribution of  $\text{Ni}_5\text{P}_4@FeV$  LDH.

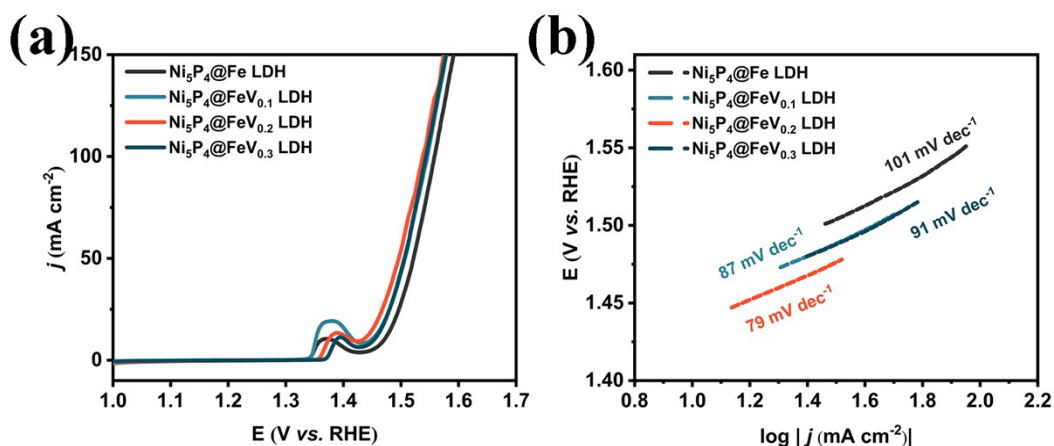

Fig. S6 (a-b) The LSV curves and tafel slope for OER for  $\text{Ni}_5\text{P}_4@\text{FeV}$  LDH with different amount of V element.

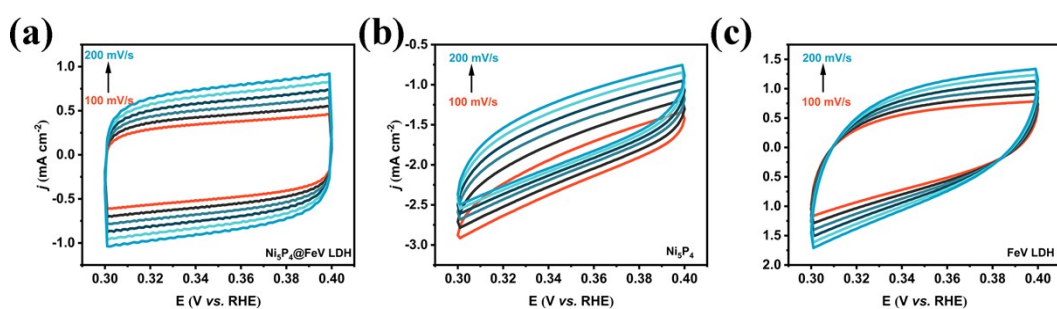

Fig. S7(a-c) Cyclic voltammograms at the scan rates from 100 to 200  $\text{mV dec}^{-1}$  for different catalyst.

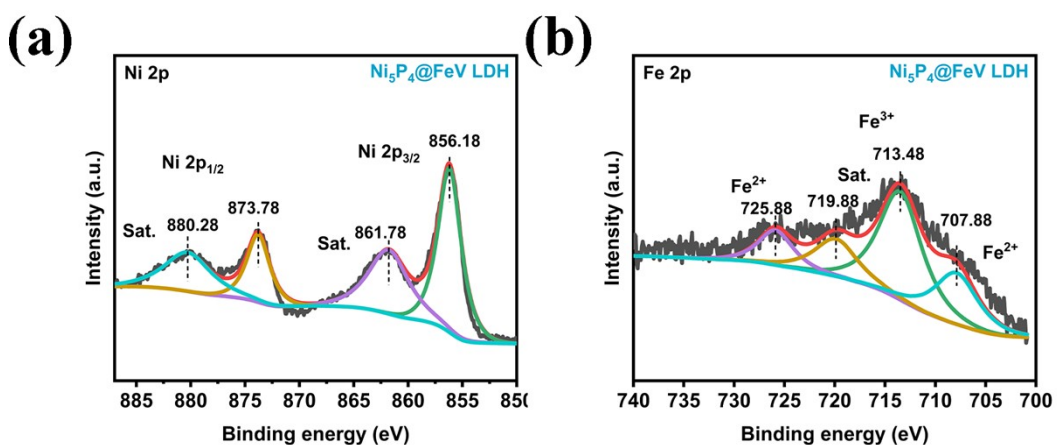

Fig. S8 (a-b) XPS spectra of Ni 2p and Fe 2p for  $\text{Ni}_5\text{P}_4$  after electrocatalysis stability test.

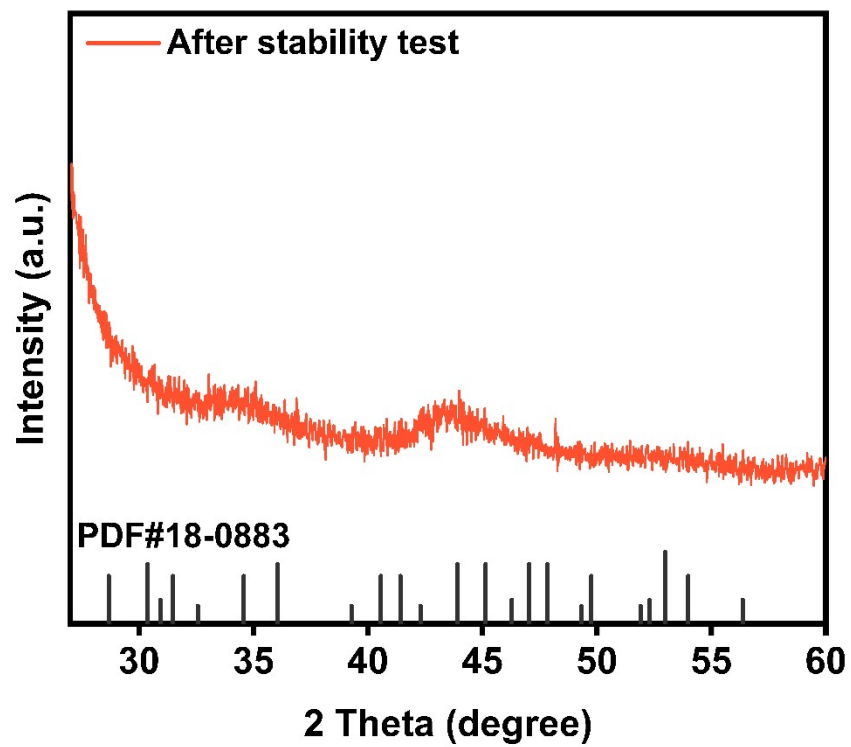

Fig. S9 (a) XRD pattern of  $\text{Ni}_5\text{P}_4@\text{FeV}$  LDH after stability test.

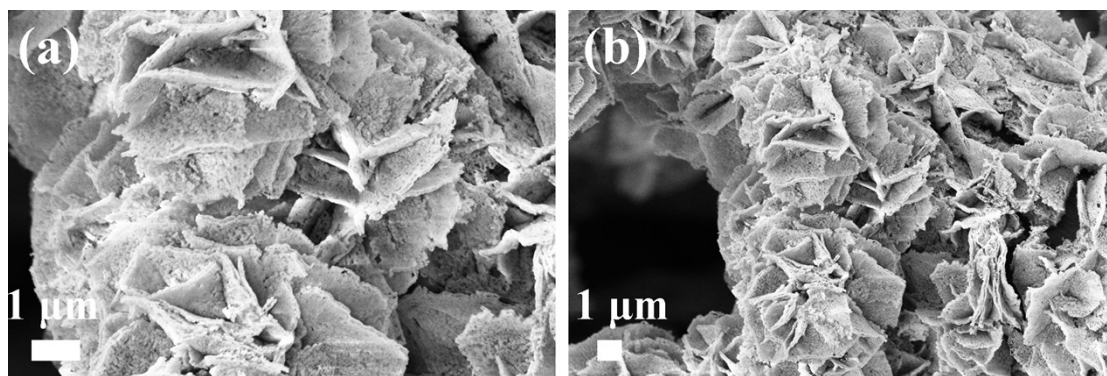

Fig. S10 (a-b) SEM images of  $\text{Ni}_5\text{P}_4@\text{FeV}$  LDH after stability test.

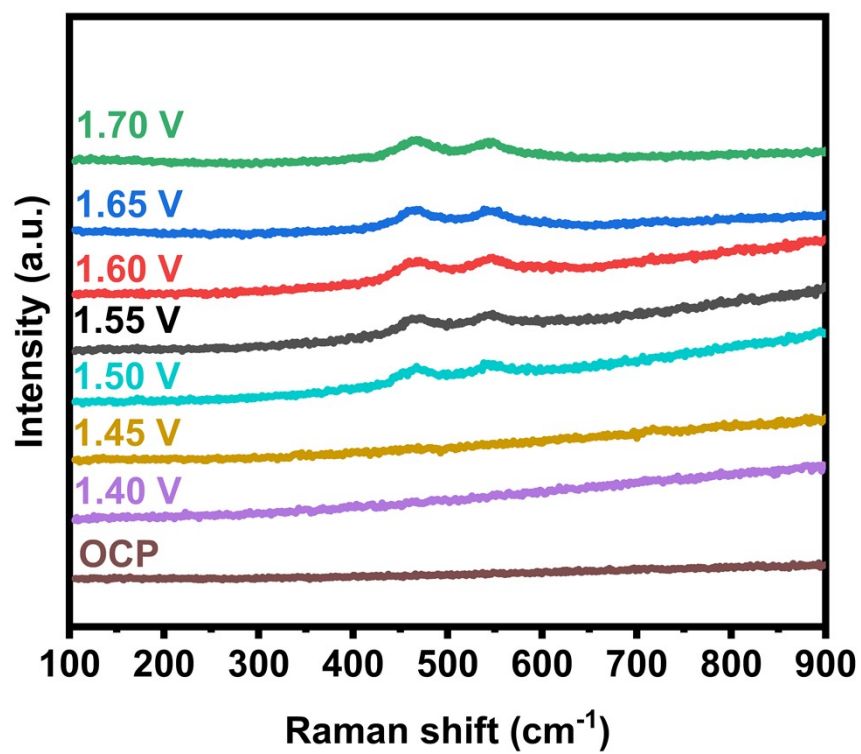

Fig. S11 The in-situ Raman spectra of Ni<sub>5</sub>P<sub>4</sub>@FeV LDH in 1 M KOH.

**Table S1. The atomic percentage of each element in the sample of Ni<sub>5</sub>P<sub>4</sub>@FeV LDH.**

| Element | Mass (%) | Atomic (%) |
|---------|----------|------------|
| P       | 30.73    | 45.53      |
| Ni      | 62.61    | 48.95      |
| Fe      | 6.06     | 4.98       |
| V       | 0.60     | 0.54       |

**Table S2. Comparison of the OER activity of several recently catalysts.**

| Catalysts                               | Electrolyte | Overpotential / 10 mA cm <sup>-2</sup> | Reference        |
|-----------------------------------------|-------------|----------------------------------------|------------------|
| Ni <sub>5</sub> P <sub>4</sub> @FeV LDH | 1 M KOH     | 204 mV                                 | <b>This work</b> |
| Cobalt substituted NiFe                 | 1 M KOH     | 290 mV                                 | 1                |
| Ag-CoFe@NC                              | 1 M KOH     | 320 mV                                 | 2                |
| CoFe@NC/NCHNSs-700                      | 1 M KOH     | 285 mV                                 | 3                |
| NiCo-LDH@FeOOH/CFP                      | 1 M KOH     | 224 mV                                 | 4                |
| CoNiN@NiFe LDH                          | 1 M KOH     | 227 mV                                 | 5                |
| CoFe-P/NF                               | 1 M KOH     | 287 mV                                 | 6                |
| NiFe-LDH-0.4M HMS                       | 1 M KOH     | 290 mV                                 | 7                |
| CoNi-LDH@PCPs                           | 1 M KOH     | 350 mV                                 | 8                |
| Ag@NiFe LDH                             | 1 M KOH     | 246 mV                                 | 9                |
| CrCoFe LDHs/NF                          | 1 M KOH     | 238 mV                                 | 10               |

**Table. S3 Comparison of the UOR activity of several recently catalysts.**

| Catalysts                                               | Electrolyte           | Potential (V vs. RHE) / mA cm <sup>-2</sup>                    | Reference        |
|---------------------------------------------------------|-----------------------|----------------------------------------------------------------|------------------|
| Ni <sub>5</sub> P <sub>4</sub> @FeV LDH                 | 1 M KOH + 0.33 M urea | 1.38 V@10 mA cm <sup>-2</sup><br>1.44 V@50 mA cm <sup>-2</sup> | <b>This work</b> |
| Co <sub>3</sub> S <sub>4</sub> nanowires/NF             | 1 M KOH + 0.33 M urea | 1.54 V@50 mA cm <sup>-2</sup>                                  | 11               |
| Ni <sub>2</sub> P/CFC                                   | 1 M KOH + 0.33 M urea | 1.42 V@10 mA cm <sup>-2</sup>                                  | 12               |
| Fe-Ni <sub>3</sub> S <sub>2</sub> @FeNi <sub>3</sub> -8 | 1 M KOH + 0.33 M urea | 1.40 V@10 mA cm <sup>-2</sup>                                  | 13               |
| Fe <sub>3</sub> O <sub>4</sub> -NiO/NF                  | 1 M KOH + 0.33 M urea | 1.44 V@10 mA cm <sup>-2</sup>                                  | 14               |
| NiMo@ZnO/NF                                             | 1 M KOH + 0.33 M urea | 1.405 V@10 mA cm <sup>-2</sup>                                 | 15               |
| NiF <sub>3</sub> /Ni <sub>2</sub> P@CC-2                | 1 M KOH + 0.33 M urea | 1.36 V@10 mA cm <sup>-2</sup>                                  | 16               |
| V <sub>8</sub> C <sub>7</sub> /CoP-0.11                 | 1 M KOH + 0.33 M urea | 1.40 V@10 mA cm <sup>-2</sup>                                  | 17               |
| CoFe LDH/MOF-0.06                                       | 1 M KOH + 0.33 M urea | 1.45 V@10 mA cm <sup>-2</sup>                                  | 18               |
| Ni@NCNT-3                                               | 1 M KOH + 0.5 M urea  | 1.38 V@10 mA cm <sup>-2</sup>                                  | 19               |
| Ni-MOF-0.5                                              | 1 M KOH + 0.5 M urea  | 1.38 V@10 mA cm <sup>-2</sup>                                  | 20               |

## References

1. A. C. Thenuwara, N. H. Attanayake, J. Yu, J. P. Perdew, E. J. Elzinga, Q. Yan and D. R. Strongin, *The Journal of Physical Chemistry B*, 2017, **122**, 847–854.
2. Y. Wang, H. Yuan, F. Liu and T. Hu, *Journal of Materials Chemistry A*, 2021, **9**, 7114–7121.
3. S. Wang, H. Wang, C. Huang, P. Ye, X. Luo, J. Ning, Y. Zhong and Y. Hu, *Applied Catalysis B: Environmental*, 2021, **298**.
4. X. Han, Y. Niu, C. Yu, Z. Liu, H. Huang, H. Huang, S. Li, W. Guo, X. Tan and J. Qiu, *Nano Energy*, 2020, **69**.
5. J. Wang, G. Lv and C. Wang, *Applied Surface Science*, 2021, **570**.
6. D. Duan, D. Guo, J. Gao, S. Liu and Y. Wang, *J Colloid Interf Sci*, 2022, **622**, 250–260.
7. H. H. Zhong, T. Y. Liu, S. W. Zhang, D. Li, P. Tang, N. Alonso-Vante and Y. Feng, *Journal of Energy Chemistry*, 2019, **33**, 130–137.
8. W. Wang, Y. Lu, M. Zhao, R. Luo, Y. Yang, T. Peng, H. Yan, X. Liu and Y. Luo, *ACS Nano*, 2019, **13**, 12206–12218.
9. L. Wu, J. Zhang, S. Wang, Q. Jiang, R. Feng, S. Ju, W. Zhang and F. Song, *Chemical Engineering Journal*, 2022, **442**.
10. L. Wen, X. Zhang, J. Liu, X. Li, C. Xing, X. Lyu, W. Cai, W. Wang and Y. Li, *Small*, 2019, **15**.
11. J. Wu, J. Fan, S. Li, K. Cui, J. Wu, H.-G. Jin, W. Luo and Z. Chao, *Materials Science and Engineering: B*, 2022, **278**.
12. X. Zhang, Y. Y. Liu, Q. Z. Xiong, G. Liu, C. Zhao, G. Wang, Y. Zhang, H. Zhang and H. Zhao, *Electrochimica Acta*, 2017, **254**, 44–49.
13. W. X. Zhang, Q. Jia, H. Liang, L. Cui, D. Wei and J. Q. Liu, *Chemical Engineering Journal*, 2020, **396**, 125315.
14. M. Han and G. Yan, *Chemical Papers*, 2020, **74**, 4473–4480.
15. J. Cao, H. Li, R. Zhu, L. Ma, K. Zhou, Q. Wei and F. Luo, *Journal of Alloys and Compounds*, 2020, **844**.
16. K. Wang, W. Huang, Q. Cao, Y. Zhao, X. Sun, R. Ding, W. Lin, E. Liu and P. Gao, *Chemical Engineering Journal*, 2022, **427**.
17. L. Wu, M. Zhang, Z. Wen and S. Ci, *Chemical Engineering Journal*, 2020, **399**.
18. S. Huang, Y. Wu, J. Fu, P. Xin, Q. Zhang, Z. Jin, J. Zhang, Z. Hu and Z. Chen, *Nanotechnology*, 2021, **32**.
19. Q. Zhang, F. M. D. Kazim, S. Ma, K. Qu, M. Li, Y. Wang, H. Hu, W. Cai and Z. Yang, *Applied Catalysis B: Environmental*, 2021, **280**.
20. S. Zheng, Y. Zheng, H. Xue and H. Pang, *Chemical Engineering Journal*, 2020, **395**.
